# Supplementary material for: Morpho-Physiological and Genomic Evaluation of Juglans Species Reveals Regional Maladaptation to Cold Stress
Source: Front Plant Sci. 2020 Mar 10;11:229. doi: 10.3389/fpls.2020.00229 (PMC7077431; doi:10.3389/fpls.2020.00229)
Supplement: Supplementary file 3 [file Table_2.XLSX]

## Sheet: Sheet1
Supplementary Table 2: Statistical data of population indices for random genes of chromosome 1 among the nine identified Juglans pools.
JW: Japanese walnut; BW: Black walnut; BN: Butternut; HY: Hybrid; AW: Arizona walnut; MW: Manchurian walnut; PWA: Persian walnut Asia; PWU: Persian walnut USA; TajD: Tajima’s D; het: heterozygosity; nsnps: number of SNPs; pi: nucleotide diversity; FST: Total genetic variance in population.
name	Function		TajD:JW	TajD:BW	TajD:BN	TajD:HY	TajD:AW	TajD:MW	TajD:PWA	TajD:PWU	het:JW	het:BW	het:BN	het:HY	het:AW	het:MW	het:PWA	het:PWU	nsnps:JW	nsnps:BW	nsnps:BN	nsnps:HY	nsnps:AW	nsnps:MW	nsnps:PWA	nsnps:PWU	FST	pi:JW	pi:BW	pi:BN	pi:HY	pi:AW	pi:MW	pi:PWA	pi:PWU
Chr01:g20	>sp|Q9SCZ4|FERON_ARATH:Receptor-like protein kinase FERONIA OS=Arabidopsis thaliana GN=FER PE=1 SV=1		0.712392	nan	-0.186513	0.451257	0.371785	-0.698407	nan	nan	0.0142462	0.00680303	0.00133111	0.0441557	0.0170848	0.00801044	0.0213648	0.00690057	768.5	763.333	719.6	676.25	760	774	392.25	717	0.686962	0.00593415	0.00442462	0.00360904	0.0186306	0.0061277	0.0227165	0.00430669	0.037464
Chr01:g23	>sp|P92555|M1250_ARATH:Uncharacterized mitochondrial protein AtMg01250 OS=Arabidopsis thaliana GN=AtMg01250 PE=4 SV=1		0.690668	nan	-0.0549975	1.03634	nan	-0.688268	0.444146	1.31959	0.0490756	0.0447938	0.00435067	0.0986397	0.054837	0.0213684	0.0060751	0.02335	975.25	769.667	798	827.5	781.5	1000.4	540.75	1004	-0.0177981	0.0087227	0.0107861	0.00490911	0.0249522	0.014605	0.000305308	0.00977959	0.000286164
Chr01:g24	>sp|Q9FIW9|ZHD10_ARATH:Zinc-finger homeodomain protein 10 OS=Arabidopsis thaliana GN=ZHD10 PE=1 SV=1		nan	0.259974	nan	nan	0.264296	-0.0200827	-0.0794363	0.411329	0.00694489	0.0207864	0.00432242	0.0335106	0.0271576	0.0212547	0.00267176	0.0179167	609.75	656.167	602.6	478	591	643.6	375.25	719.6	0.775748	0.00194637	0.00444067	0.00218819	0.00747019	0.00398539	0.00487319	0.00361323	0.0060425
Chr01:g26	>sp|Q9LJW5|MIF2_ARATH:Mini zinc finger protein 2 OS=Arabidopsis thaliana GN=MIF2 PE=1 SV=1		NA	1.06589	-0.346768	0.336027	0.418073	1.44416	-0.0580645	0.0163547	0	0.00282669	0.00663935	0.0243868	0.0295898	0.00340481	0.00632268	0.00327869	117.25	119.333	112.8	97	118.5	118	59.75	118.8	0.750832	0.00075	0.00155193	0.000875	0.00409464	0.00250906	0.00464044	0.0012641	0.0116402
Chr01:g27	>sp|P81392|MYB06_ANTMA:Myb-related protein 306 OS=Antirrhinum majus GN=MYB306 PE=2 SV=1		nan	-0.248047	0.152752	1.67114	0.892292	1.16135	nan	NA	0.00102459	0.00136347	0.00552803	0.0272778	0.0121457	0.0186202	0.00203252	0	239.5	242	232.4	209.5	240.5	247.6	124.75	232.6	0.814221	0.000339285	0.00191646	0.00366072	0.00949176	0.00526023	0.0101055	0.00117384	0.0119617
Chr01:g28	>sp|P73245|Y1917_SYNY3:Oxygen-independent coproporphyrinogen-III oxidase-like protein sll1917 OS=Synechocystis sp. (strain PCC 6803 / Kazusa) GN=sll1917 PE=2 SV=1		-0.247959	0.17716	1.1301	1.25878	1.54056	-0.12765	-0.406519	0.0632577	0.0134409	0.00953625	0.019595	na	0.00649351	0.0233645	0.00290698	0.00465116	92.5	85.8333	66.8	na	96.5	98.2	86	155.2	0.657556	0.00141182	0.00454556	0.00157365	0.000412165	0.00316667	na	0.00123081	na
Chr01:g31	>sp|P40590|RL34_PEA:60S ribosomal protein L34 OS=Pisum sativum GN=RPL34 PE=2 SV=1		nan	nan	0.884796	1.21263	0.610366	nan	-0.658698	1.49605	0.0230717	0.023056	0.0617482	0.0385889	0.0232192	0.00806099	0.0169279	0.0227526	368.5	324.667	368.6	257.75	327	398.2	210.25	403.4	0.711139	0.00331368	0.0029441	0.00364607	0.0033314	0.00312921	0.00215361	0.00450909	0.00686117
Chr01:g32	>sp|Q9ZVH0|FEZ_ARATH:Protein FEZ OS=Arabidopsis thaliana GN=FEZ PE=2 SV=1		0.552401	1.16544	-0.475529	0.75138	0.231099	-0.226098	-0.319318	nan	0.0127008	0.012375	0.0128035	0.0615744	0.00877193	0.0148638	0.00876384	0.00677883	547.75	553	503	475.5	522.5	551.8	272.5	534.2	0.801101	0.00308988	0.00141282	0.00329551	0.0137883	0.00270833	0.00959193	0.00204675	0.0156077
Chr01:g33	>sp|Q9LU10|DEGP8_ARATH:Protease Do-like 8_ chloroplastic OS=Arabidopsis thaliana GN=DEGP8 PE=1 SV=1		-0.590278	nan	-0.227722	0.966739	nan	0.369747	-0.186218	2.05525	0.0312353	0.0219818	0.0214913	0.0498719	0.0118882	0.0202106	0.0151449	0.0149359	1412	896	1380.6	991.25	907	1424.6	720.75	1352.4	0.662165	0.00697897	0.00313911	0.00403683	0.0113724	0.00550149	0.00906861	0.00264596	0.0197946
Chr01:g35	>sp|Q9LU10|DEGP8_ARATH:Protease Do-like 8_ chloroplastic OS=Arabidopsis thaliana GN=DEGP8 PE=1 SV=1		-0.995399	-0.7904	0.155747	0.796849	0.594879	nan	-0.483649	nan	0.00904062	0.016177	0.00829345	0.0494811	0.0147075	0.00836926	0.00341615	0.00432031	1567.5	1593.33	1505.8	1374.75	1580	1579.8	818.5	1538.4	0.756889	0.00271681	0.00325293	0.00302801	0.0119612	0.00613775	0.0124516	0.00366884	0.0156418
Chr01:g36	>sp|Q8LC68|NRP2_ARATH:NAP1-related protein 2 OS=Arabidopsis thaliana GN=NRP2 PE=1 SV=2		-0.164077	-0.126294	0.833885	0.587353	0.20127	-0.599971	nan	nan	0.0437879	0.013705	0.0306168	0.0407539	0.0238926	0.0213183	0.00169492	0.00329265	888	899.667	864	764.5	888	880.6	449	831.8	0.731675	0.0105839	0.0038492	0.00585115	0.0137731	0.00953088	0.0120896	0.00366658	0.0182107
Chr01:g37	>sp|A8C752|THADA_CHLAE:Thyroid adenoma-associated protein homolog OS=Chlorocebus aethiops GN=THADA PE=2 SV=1		-0.576014	0.450138	-0.102981	0.49201	0.485564	nan	-0.388558	0.152002	0.0297788	0.0406584	0.0175131	0.0390579	0.0312601	0.0194652	0.00516922	0.00297521	1200.25	1200.83	1155.6	1064.5	1199	1203.4	604.75	1155.6	0.692449	0.00490399	0.00502522	0.00308163	0.00688212	0.006	0.0113339	0.00484279	0.0125443
Chr01:g38	>sp|Q9C9L0|CUL3B_ARATH:Cullin-3B OS=Arabidopsis thaliana GN=CUL3B PE=1 SV=1		0.521166	1.24677	NA	0.821387	-0.833788	-0.488293	-0.480177	0.862692	0.0255299	0.0380044	0	0.0291438	0.050283	0.0140508	0.00277778	0.0137255	69	96.5	64.6	70.25	99.5	70.8	47.5	88.6	0.707513	0.00144675	0.003341	0.000928571	0.00202484	0.00450375	0.0015252	0.00186842	0.00286205
Chr01:g42	>sp|Q9M2G7|LPPD_ARATH:Lipid phosphate phosphatase delta OS=Arabidopsis thaliana GN=LPPD PE=2 SV=1		0.825371	0.885778	1.02373	0.201795	1.16745	0.978646	0.401621	0.966294	0.148015	0.0267459	0.0684439	0.0632965	0.0454545	0.168357	0.065873	0.0911387	226	142.333	170.6	258.5	125.5	238	157.5	295.6	0.41453	0.0104102	0.00374127	0.0132768	0.00611964	0.00856423	na	0.00286004	0.00200875
Chr01:g43	>sp|Q9FLF0|RS92_ARATH:40S ribosomal protein S9-2 OS=Arabidopsis thaliana GN=RPS9C PE=1 SV=1		nan	nan	nan	0.308296	nan	nan	-0.405655	1.37251	0.01209	0.0638039	0.01424	0.0549436	0.0825091	0.0106864	0.00663717	0.00581565	331.25	339.5	320.4	282.25	339.5	339	170.5	321	0.63918	0.00253782	0.00723701	0.00226786	0.00737292	0.0175058	0.00788001	0.00577959	0.00808063
Chr01:g45	>sp|P33629|TBA_PRUDU:Tubulin alpha chain OS=Prunus dulcis GN=TUBA PE=2 SV=1		-0.597238	-1.44273	-0.848859	0.255038	-0.478163	-0.129271	-0.630869	-0.253185	0.0143998	0.0129413	0.00657251	0.0244137	0.0225868	0.00347274	0.00247525	0.00204866	401	398.667	395.2	322.25	395.5	402.6	202.25	364.6	0.70359	0.00259524	0.00164564	0.000809524	0.00585668	0.00500158	0.0157931	0.00396602	0.0255395
Chr01:g46	>sp|Q9LJX0|AB19B_ARATH:ABC transporter B family member 19 OS=Arabidopsis thaliana GN=ABCB19 PE=1 SV=1		nan	-1.033	nan	0.886593	-0.482179	nan	0.742526	1.13547	0.00302354	0.0102336	0.00381545	0.0335924	0.0115946	0.00482696	0.00271471	0.00592264	988	992.5	928.8	850.25	980.5	995.4	506.75	939.2	0.775907	0.00151356	0.0021629	0.00306354	0.00848434	0.00190052	0.0122415	0.00133582	0.0151639
Chr01:g47	>sp|Q8GW32|PRE6_ARATH:Transcription factor PRE6 OS=Arabidopsis thaliana GN=PRE6 PE=1 SV=1		nan	-0.159505	nan	0.398176	0.477624	-1.04227	1.1665	0.120301	0.00143678	0.0974896	0.00233238	0.0258006	0.14291	0.0091188	0	0.00320856	170	172.167	168.4	129.75	169	177.6	89.25	174.2	0.68392	0.00100122	0.0122806	0.0016971	0.00457897	0.0150449	0.00207331	0.00948147	0.00715019
Chr01:g48	>sp|Q9LFD5|BPA1_ARATH:Binding partner of ACD11 1 OS=Arabidopsis thaliana GN=BPA1 PE=1 SV=1		0.825437	nan	nan	0.989477	-0.555447	-0.138272	-0.254758	0.811476	0.00979335	0.00587045	0.0095522	0.0352575	0.018467	0.00740596	0.00557207	0.0148035	663.25	681.333	633.6	553.5	674.5	671.8	340.5	638.6	0.722571	0.00243619	0.0026815	0.00274889	0.00920733	0.00380381	0.0190678	0.0026266	0.0144203
Chr01:g50	>sp|Q00466|HAT7_ARATH:Homeobox-leucine zipper protein HAT7 OS=Arabidopsis thaliana GN=HAT7 PE=2 SV=4		nan	0.471823	nan	1.0962	-0.110011	-0.272612	-1.04269	1.55981	0.00469246	0.0200131	0.00676188	0.0193887	0.00573751	0.00922804	0.00170068	0.00536218	425.75	440.333	426.4	344.75	440	431.6	222.25	416.6	0.777925	0.0020648	0.00562663	0.00245623	0.00518618	0.0035	0.0148778	0.00373474	0.00736579
Chr01:g51	>sp|P0C2F6|RNHX1_ARATH:Putative ribonuclease H protein At1g65750 OS=Arabidopsis thaliana GN=At1g65750 PE=3 SV=1		0.357006	-0.232264	0.314855	0.434499	nan	0.400571	-0.975178	0.654646	0.0659653	0.0932709	0.077468	0.0284596	0.101452	0.075646	0.00487805	0.016267	450.75	581.167	571.8	500.5	469.5	442	307.5	589.6	0.449742	0.0122614	0.0178377	0.0147478	0.00859471	0.0184742	0.00351165	0.0130821	0.00270703
Chr01:g54	>sp|Q2NI00|DHQS_METST:3-dehydroquinate synthase OS=Methanosphaera stadtmanae (strain ATCC 43021 / DSM 3091 / JCM 11832 / MCB-3) GN=aroB' PE=3 SV=1		0.564248	-0.958141	-0.386906	0.806345	-0.672273	nan	-0.282361	1.30245	0.00949846	0.00935073	0.0101769	0.0362924	0.00703013	0.00475105	0.00148221	0.00664445	499.5	498	486.2	415.25	497.5	505	254.25	483.8	0.791914	0.00156308	0.00166621	0.00173511	0.00635304	0.00125	0.0162368	0.0011986	0.0152961
Chr01:g55	>sp|Q9GKX6|GALM_PIG:Aldose 1-epimerase OS=Sus scrofa GN=GALM PE=2 SV=1		nan	nan	nan	1.16664	0.0466182	nan	0.143761	0.774899	0.0146616	0.0509325	0.0114753	0.0421398	0.0233193	0.0200167	0.00169779	0.00373514	579	579.333	570.8	502	579	579.4	294	539.4	0.775179	0.00323809	0.00632285	0.0043469	0.0133319	0.00445834	0.0135265	0.00522959	0.0154252
Chr01:g56	>sp|Q8LGJ5|PCO2_ARATH:Plant cysteine oxidase 2 OS=Arabidopsis thaliana GN=PCO2 PE=1 SV=1		nan	nan	-0.887435	0.809181	-0.64488	nan	-0.466273	0.408563	0.003311	0.0141791	0.00700669	0.0432438	0.00361011	0.010243	0.00221239	0.00352113	542.25	552.167	519.6	480.5	537.5	549.6	283	530.4	0.783877	0.00290488	0.00326624	0.00305574	0.0100961	0.00126879	0.00924436	0.00265553	0.0119509
Chr01:g57	>sp|Q9LHA4|VA0D2_ARATH:V-type proton ATPase subunit d2 OS=Arabidopsis thaliana GN=VHA-d2 PE=2 SV=1		0.44953	-0.191524	0.310565	0.843913	-0.677388	-0.363005	1.11947	1.41977	0.0141859	0.00921529	0.00573275	0.0336342	0.0042517	0.0136887	0.00488599	0.0074342	617.75	632.333	608.2	511.75	609	631	314	587.4	0.641313	0.00478762	0.00352255	0.00519111	0.00820374	0.00205556	0.013664	0.00235774	0.0188791
Chr01:g59	>sp|Q6X5Y6|WRI1_ARATH:Ethylene-responsive transcription factor WRI1 OS=Arabidopsis thaliana GN=WRI1 PE=2 SV=1		0.497071	0.310943	-0.575343	0.0890185	nan	-0.787046	0.787516	1.38167	0.0133559	0.00422429	0.00696178	0.0482191	0.00933523	0.00464037	0.00570776	0.00821918	430.5	433.333	416.6	388.75	430	432	219	426.2	0.755668	0.00202381	0.0015952	0.000809524	0.00954682	0.00250083	0.0174542	0.00173734	0.0152549
Chr01:g60	>sp|O04235|SSRP1_VICFA:FACT complex subunit SSRP1 OS=Vicia faba GN=SSRP1 PE=2 SV=1		-0.198039	nan	-0.739912	0.570094	1.75446	0.28103	0.223364	nan	0.0165886	0.0167575	0.0111689	0.0355896	0.00474002	0.0154184	0.00319984	0.00435458	1405.5	1433.67	1365.6	1195	1379	1416	749	1366.4	0.734739	0.00500879	0.00566651	0.00479092	0.00921069	0.00928835	0.0137024	0.00357432	0.0108846
Chr01:g61	>sp|P15722|PLY59_SOLLC:Probable pectate lyase P59 OS=Solanum lycopersicum GN=LAT59 PE=2 SV=1		nan	nan	-1.00778	1.22689	nan	nan	-0.129411	nan	0.00416199	0.00467744	0.00242923	0.0312995	0	0.00237154	0.00520833	0.00629921	245.5	247.5	243.4	211.5	239.5	252.4	123.5	228.8	0.822604	0.00203616	0.000951001	0.00171429	0.00586464	0.00166666	0.00908609	0.000863931	0.0119891
Chr01:g62	>sp|Q9LFP6|PIN8_ARATH:Auxin efflux carrier component 8 OS=Arabidopsis thaliana GN=PIN8 PE=2 SV=1		nan	nan	0.114725	0.780195	1.7821	-0.798456	0.0063009	1.34153	0.0027778	0.00535088	0.00401914	0.0416687	0	0.00814815	0.00361011	0.0063855	269.75	278.333	253.6	238	270.5	270.2	139.75	264.8	0.759904	0.000768355	0.00165642	0.00236976	0.00668602	0.00640031	0.0118236	0.000921797	0.01316
Chr01:g63	>sp|P42055|VDAC1_SOLTU:Mitochondrial outer membrane protein porin of 34 kDa OS=Solanum tuberosum PE=1 SV=2		1.34507	-0.664219	-0.0499533	1.21251	1.94541	-0.268728	0.488884	nan	0.0172399	0.00835878	0.00293407	0.0393436	0	0.0146008	0	0.00192539	400.75	398.5	396	327.25	381.5	402.4	202	372.8	0.810107	0.00438095	0.00221641	0.00288993	0.00725963	0.00487572	0.00879927	0.00152007	0.00839083
Chr01:g65	>sp|Q9LFP7|PIX7_ARATH:Probable serine/threonine-protein kinase PIX7 OS=Arabidopsis thaliana GN=PIX7 PE=1 SV=1		nan	-0.953552	nan	0.9836	1.62177	0.060809	nan	nan	0.00815958	0.00885773	0.00338611	0.0382868	0.00322723	0.0101711	0.000765697	0.00152672	642	640.667	627	494	620	649.6	327	608.8	0.802093	0.00190061	0.00212128	0.00186568	0.00680686	0.00306667	0.0130484	0.00155649	0.0156591
Chr01:g66	>sp|Q9SR06|CLP1_ARATH:Protein CLP1 homolog OS=Arabidopsis thaliana GN=CLPS3 PE=1 SV=1		nan	0.430611	0.394471	nan	1.1115	nan	0.874448	-0.922699	0.012589	0.0289985	0.013349	0.0542701	0.00896057	0.00934229	0.0104757	0.00674793	977.75	1078.67	963.2	852.25	1059	1005.8	591.25	1135	0.735576	0.00238394	0.00630861	0.0029687	0.0119794	0.00717076	0.0081724	0.00244045	0.0100409
Chr01:g68	>sp|Q54S83|NDUF7_DICDI:Protein arginine methyltransferase NDUFAF7 homolog_ mitochondrial OS=Dictyostelium discoideum GN=midA PE=1 SV=1		-0.726782	0.953391	0.223788	1.29431	1.57598	nan	1.13254	-1.07395	0.00771848	0.0235996	0.0120083	0.0614833	0.00651472	0.00390611	0.00448143	0.00220049	771	793.5	757.8	686	779.5	777.4	399.75	764.8	0.754037	0.0017863	0.00547471	0.00132866	0.0133764	0.00622222	0.0146336	0.00361367	0.00966654
Chr01:g69	>sp|Q38879|TRXH2_ARATH:Thioredoxin H2 OS=Arabidopsis thaliana GN=TRX2 PE=2 SV=2		-1.45996	-0.476042	nan	0.0843965	nan	-0.0393005	nan	nan	0.020809	0.0133574	0.0114187	0.0707907	0	0.0302683	0.00396825	0.00941318	154.5	159.333	154.2	160.25	147.5	158.6	95.25	177.6	0.781115	0.00183928	0.00200663	0.00269643	0.0144248	0.00733333	0.00971612	0.00330076	0.00544073
Chr01:g70	>sp|Q08435|PMA1_NICPL:Plasma membrane ATPase 1 OS=Nicotiana plumbaginifolia GN=PMA1 PE=2 SV=1		nan	nan	0.711344	1.17185	1.42677	-0.0439395	-0.0780973	1.18434	0.0399856	0.023101	0.0125734	0.0525627	0.0145285	0.0475734	0.00254965	0.0105341	1708	1832.5	1633.8	1505.5	1756.5	1743	951.75	1780.2	0.753869	0.00944148	0.00622618	0.0119008	0.014802	0.00982447	0.0102695	0.0062137	0.0115334
Chr01:g73	>sp|A2ARP1|VIP1_MOUSE:Inositol hexakisphosphate and diphosphoinositol-pentakisphosphate kinase 1 OS=Mus musculus GN=Ppip5k1 PE=1 SV=1		-0.700382	-1.27033	nan	0.693715	1.8395	-0.582309	0.806092	0.445435	0.00843959	0.0250479	0.00392022	0.0461045	0.00628502	0.0125698	0.00961646	0.020566	1759.25	1796	1705	1462.25	1736.5	1785.4	895.5	1673.8	0.713376	0.00247618	0.00594751	0.00283	0.00939352	0.00770603	0.0115989	0.0033598	0.0163978
Chr01:g75	>sp|Q9LJI9|PP260_ARATH:Pentatricopeptide repeat-containing protein At3g28660 OS=Arabidopsis thaliana GN=PCMP-E80 PE=2 SV=1		-0.728248	NA	0.139391	0.534199	1.00766	-0.355241	1.90568	0.465983	0.00858369	0	0.00257511	0.0317871	0.00675676	0.0171674	0.0150215	0.0223176	233	231.5	218.6	190	227	233	116.5	216.4	0.689227	0.00203571	0.000645092	0.00216072	0.0050774	0.00266666	0.00869842	0.00178779	0.0129024
Chr01:g78	>sp|P25600|YCH4_YEAST:Putative transposon Ty5-1 protein YCL074W OS=Saccharomyces cerevisiae (strain ATCC 204508 / S288c) GN=TY5A PE=5 SV=2		0.571288	0.344206	0.557822	0.329853	0.393286	0.60834	-0.564999	-1.15256	0.141652	0.11152	0.12811	0.0399472	0.102884	0.153951	0.0508128	0.0252199	283.25	275.333	233.4	263.5	282.5	266.4	169.5	299.6	0.317168	0.0160283	0.01716	0.0252241	0.00740312	0.0258253	0.000857146	0.0112876	0.00518686
Chr01:g79	>sp|F4JFJ3|Y3206_ARATH:ATP-dependent DNA helicase At3g02060_ chloroplastic OS=Arabidopsis thaliana GN=At3g02060 PE=2 SV=1		0.101098	nan	-1.04718	0.669797	0.69402	nan	0.202775	-1.23872	0.00787504	0.0111928	0.0131955	0.0369847	0.00741525	0.00216998	0.0229111	0.00623024	565.25	507.833	557	467.75	489.5	578.6	292.25	568.2	0.81753	0.00193981	0.00173187	0.00159851	0.0088333	0.0029	0.0117658	0.00224909	0.0112244
Chr01:g81	>sp|Q9LPV9|LWD1_ARATH:WD repeat-containing protein LWD1 OS=Arabidopsis thaliana GN=LWD1 PE=2 SV=1		1.26889	-0.56273	nan	1.24186	0.896325	-0.192712	-0.88703	-1.14123	0.00482268	0.0123509	0.0152989	0.0205587	0.00751161	0.00196914	0.0234511	0.00789921	308.75	350.833	291.4	270	329.5	311	226.5	411	0.771259	0.0014664	0.00176845	0.00122805	0.00355985	0.003125	0.00693469	0.00327181	0.0044261
Chr01:g88	>sp|Q9LT84|U496M_ARATH:UPF0496 protein At3g19330 OS=Arabidopsis thaliana GN=At3g19330 PE=2 SV=2		nan	-0.430034	nan	0.935885	0.272801	-1.0107	-0.284715	-1.50312	0.00776099	0.015843	0.00322949	0.0425877	0.0280672	0.00438742	0.0400981	0.0160023	468	484.667	478.2	388	472	503	268	507.8	0.813414	0.00263722	0.00215945	0.00126956	0.0104863	0.00621124	0.00869032	0.00343524	0.00927998
Chr01:g90	>sp|P04323|POL3_DROME:Retrovirus-related Pol polyprotein from transposon 17.6 OS=Drosophila melanogaster GN=pol PE=3 SV=1		nan	nan	-0.646376	0.862649	0.221047	-1.35135	-0.507651	-1.42124	0.00581499	0.019674	0.00581892	0.0925311	0.01449	0.00914612	0.031915	0.0133856	727.75	751.5	717.2	635.25	741	747	393.75	744	0.819013	0.00207911	0.00354204	0.00149468	0.0206923	0.00400051	0.00728392	0.00291646	0.011208
Chr01:g91	>sp|Q9S7I6|RPK2_ARATH:LRR receptor-like serine/threonine-protein kinase RPK2 OS=Arabidopsis thaliana GN=RPK2 PE=2 SV=1		nan	-0.598913	nan	0.682758	-0.119933	nan	0.0325568	-1.69767	0.00405687	0.0210728	0.00400824	0.156458	0.0180261	0.00400955	0.0735949	0.0296852	490.5	497.333	492.4	436.75	501.5	503.6	254.75	487.4	0.800436	0.00085716	0.00180588	0.000823091	0.0192096	0.00383556	0.00728239	0.00264495	0.00115402
Chr01:g96	>sp|P51132|UCRI2_TOBAC:Cytochrome b-c1 complex subunit Rieske-2_ mitochondrial OS=Nicotiana tabacum PE=2 SV=1		-0.88512	-0.338499	0.631227	1.17219	0.629302	0.479613	-1.25886	-1.30261	0.00386018	0.0135505	0.00122453	0.0336898	0.00751073	0.0150804	0.00358722	0.00160173	455.25	491.5	442.2	389.25	476.5	464.6	243	474.8	0.747401	0.00103613	0.00369265	0.00302698	0.00751645	0.00641667	0.0126575	0.0029388	0.0156362
Chr01:g98	>sp|P92519|M810_ARATH:Uncharacterized mitochondrial protein AtMg00810 OS=Arabidopsis thaliana GN=AtMg00810 PE=4 SV=1		nan	nan	nan	0.556353	nan	nan	nan	nan	0.0608048	0.0186532	0.0383569	0.0751744	0.0157753	0.0483442	0.0110478	0.00417178	732	775.667	641.6	638.75	768	762.8	407.25	763.8	0.80604	0.0147951	0.00294222	0.0171022	0.0197759	0.00933932	0.0014253	0.00389686	0.00993726
Chr01:g99	>sp|O80438|MAK3_ARATH:N-alpha-acetyltransferase MAK3 OS=Arabidopsis thaliana GN=MAK3 PE=2 SV=1		0.165304	-0.710804	0.301705	0.780329	0.558576	nan	-1.47709	-0.59274	0.00349003	0.0111906	0.00436124	0.0607511	0.00821918	0.00544821	0.00602506	0.00318302	352.5	372	359.4	322.5	369.5	367.2	187.5	352	0.824159	0.00121429	0.00228602	0.00125034	0.0117637	0.00383612	0.0120654	0.00252714	0.0122493
